# Supplementary material for: Cascade Testing for Fragile X Syndrome in a Rural Setting in Cameroon (Sub-Saharan Africa)
Source: PubMed Central journal article supplement (PMC7074341; doi:10.3390/genes11020136), 2020-01-28
Supplement: genes-11-00136-s001.pdf [file genes-11-00136-s001.pdf]

**Table S1.** Summary classification of Intellectual Disability using four different scales.

| <b>Severity Category</b> | <b>Approximate Percent Distribution of Cases by Severity</b> | <b>DSM-IV Criteria (severity levels based only on IQ categories)</b> | <b>DSM-5 Criteria (severity classified based on daily skills)</b>                                           | <b>AAIDD Criteria (severity classified based on intensity of support needed)</b> | <b>SSI Listings Criteria (The SSI listings do not specify severity levels but indicate different standards for meeting or equaling listing level severity.)</b> |
|--------------------------|--------------------------------------------------------------|----------------------------------------------------------------------|-------------------------------------------------------------------------------------------------------------|----------------------------------------------------------------------------------|-----------------------------------------------------------------------------------------------------------------------------------------------------------------|
| <b>Mild</b>              | 85%                                                          | Approximate IQ range 50–69                                           | Can live independently with minimum levels of support.                                                      | Intermittent support needed during transitions or periods of uncertainty.        | IQ of 60 through 70 <i>and</i> a physical or other mental impairment imposing an additional and significant limitation of function                              |
| <b>Moderate</b>          | 10%                                                          | Approximate IQ range 36–49                                           | Independent living may be achieved with moderate levels of support, such as those available in group homes. | Limited support needed in daily situations.                                      | A valid verbal, performance, or full-scale IQ of 59 or less                                                                                                     |
| <b>Severe</b>            | 3.5%                                                         | Approximate IQ range 20–35                                           | Requires daily assistance with self-care activities and safety supervision.                                 | Extensive support needed for daily activities.                                   | A valid verbal, performance, or full-scale IQ of 59 or less                                                                                                     |
| <b>Profound</b>          | 1.5%                                                         | IQ <20                                                               | Requires 24-hour care.                                                                                      | Pervasive support needed for every aspect of daily routines.                     | A valid verbal, performance, or full-scale IQ of 59 or less                                                                                                     |
